# Supplementary material for: Loss of DNASE1L3 Drives MDSCs-Mediated Immune Suppression in HCC via HDAC9-Dependent Chromatin Remodeling and CXCL16–CXCR6 Signaling
Source: Research Square preprint supplement (doi:10.21203/rs.3.rs-7066350/v1), 2025-07-17
Supplement: Supplementary file 1 [file 3d20c43a8ec7fbe6b936126d.docx]

**Figure S1.Correlation between DNASE1L3 expression and myeloid lineage cell infiltration in human tumors.**

(A) Correlation analysis between DNASE1L3 transcript levels and the infiltration of bone marrow precursor cells, myeloid cells, monocytes, neutrophils, and macrophages across human tumors using TCGA data.Data are presented as mean ± s.e.m. Statistical analysis: Spearman correlation (A).

**Figure S2.** **DNASE1L3 deficiency modulates the immunosuppressive phenotype of MDSCs in human and murine models.**

(A) Immunofluorescence staining of DNASE1L3 in MDSCs from HCC tumors and matched adjacent tissues. Markers: DAPI (blue), CD33 (red), CD11b (green), DNASE1L3 (yellow). Scale bar = 20 μm. (B)DNASE1L3 expression in peripheral blood MDSCs from non-HCC individuals (H-NT) and HCC patients (H-T). (C, D) Western blot quantification of DNASE1L3 expression in murine MDSCs stimulated with PBS (WT) or Hepa1-6 tumor supernatant (HWT) (C), and in splenic (S), tumor-associated splenic (T-S), and intratumoral (T) MDSCs isolated from Hepa1-6 tumor-bearing mice (D). (E)Multicolor immunofluorescence (mIHC) dot plot of liver cancer tissue microarray (HLivH180Su30, n = 90 paired samples). (F)Generation and genotyping of systemic DNASE1L3-knockout mice (KO) using gel electrophoresis. The DNASE1L3-KO band was 318 bp; the WT band was 800 bp. (G)Immunofluorescence quantification analysis of Treg cell (CD25⁺FOXP3⁺) proportions in subcutaneous tumors from WT and KO mice. Staining: DAPI (blue), CD25 (red), FOXP3 (green). Scale bars = 20 μm. (H,I) Western blot quantification of ARG1(H) and NOS2(I) expression in murine MDSCs from WT and KO mice. (J) Volcano plot showing differentially expressed genes(DEGs) between subcutaneous tumors from WT and KO mice (p < 0.01). Upregulated genes (red) include immunosuppressive mediators (e.g., Cxcl2, Marco, S100a8); non-significant genes shown in black. Data are presented as mean ± s.e.m. Statistical analysis: unpaired two-tailed Student’s t-test (A–C, G–I);one-way ANOVA (D);DESeq2 and negative binomial regression (J).H-NT–Peripheral blood MDSCs from non-HCC individuals;H-T–Peripheral blood MDSCs from HCC patients;WT–Wild-type mice derived MDSCs;T-WT–Hepa1-6 tumor supernatant–stimulated WT MDSCs;KO–*Dnase1l3*-knockout mice derived MDSCs;S–Splenic MDSCs from WT mice;T-S–Splenic MDSCs from tumor-bearing mice;T–Tumor-infiltrating MDSCs.

**Figure S3. DNASE1L3 regulates chromatin accessibility and transcriptional activity via NF-κB signaling and histone modification.**

(A)KEGG pathway enrichment analysis of DEGs in subcutaneous tumors from DNASE1L3-KO and WT mice. (B) Agarose gel electrophoresis showing ChIP-PCR products from a high-confidence NF-κB (p65) binding site within the Cxcr6 promoter region. DNA fragments were enriched using anti-p65 ChIP from WT, KO, and Hepa1-6–conditioned MDSCs (t-WT, t-KO). This site was selected as the primary functional binding region for downstream validation. (C, D) Validation of alternative predicted NF-κB binding sites within the Cxcr6 promoter. (C) ChIP-qPCR analysis of p65 enrichment at candidate regions in WT, KO, HWT, and HKO MDSCs. IgG served as negative control. (D) ChIP-PCR followed by agarose gel electrophoresis of DNA fragments amplified from the same candidate regions, highlighting differential binding efficiency among sites. (E) Pathway enrichment of DNASE1L3-interacting proteins identified by mass spectrometry in WT-derived MDSCs. (F) Western blot quantification of HDAC9 and histone H3K9 acetylation (H3K9ac) in WT, KO, HWT, and HKO MDSCs; P = 0.0061 (HDAC9), P = 0.0306 (H3K9ac).(G) Sample quality control analysis of CUT&Tag sequencing libraries. DNASE1L3, AC-H3K9, and IgG control groups were assessed for signal consistency and replicate homogeneity, ensuring suitability for downstream peak calling. (H) Genomic browser view of DNASE1L3 CUT&Tag peaks overlapping ENCODE DNase I hypersensitive sites at the *Cxcr6*, *Nos2*, and *Arg1* promoter regions, indicating DNASE1L3-targeted accessible chromatin. Data are presented as mean ± s.e.m. Statistical analysis: DESeq2 and negative binomial regression (A, E); unpaired two-tailed Student’s t-test (C); one-way ANOVA (F).

**Figure S4. Anti–Gr-1 treatment modulates T cell activation and MDSC populations in DNASE1L3-deficient mice.**

(A) Flow cytometric analysis of intratumoral CD3⁺CD8⁺ T cells in wild-type (WT) and DNASE1L3 knockout (KO) mice treated with control IgG2b or anti–Gr-1 antibody. Representative gating plots are shown. DNASE1L3 KO mice exhibited reduced CD8⁺ T cell infiltration, which was partially restored upon anti–Gr-1 treatment. (B) Identification and quantification of myeloid-derived suppressor cell (MDSC) subsets in the tumor microenvironment. PMN-MDSCs (CD11b⁺Ly6G⁺Ly6Clow) and M-MDSCs (CD11b⁺Ly6G⁻Ly6Chigh) were assessed across the same treatment groups. Anti–Gr-1 antibody significantly reduced PMN-MDSC accumulation, especially in DNASE1L3 KO mice. Data are presented as mean ± s.e.m. Statistical analysis: one-way ANOVA (A-B).

**Figure S5. DNASE1L3 deficiency enhances the T cell–suppressive capacity of MDSCs** **through CXCL16–CXCR6 signaling.**

(A) Flow cytometry histograms showing CFSE dilution in CD3⁺CD8⁺ T cells after co-culture with MDSCs derived from various experimental groups.T cells were co-cultured at decreasing effector-to-target (E:T) ratios (1:1, 1:2, 1:4, 1:8), and proliferation was assessed via CFSE dilution. DNASE1L3-deficient MDSCs (KO, HKO) exhibited stronger suppression of T cell proliferation, which was enhanced by CXCL16 stimulation (K16) and reversed by CXCR6 blockade (KT6, K166). These results support the role of CXCL16–CXCR6 signaling in mediating DNASE1L3-related immunosuppression. WT/KO: MDSCs derived from wild-type or DNASE1L3 knockout mice;HWT/HKO: WT or KO MDSCs stimulated with Hepa1-6 conditioned medium;WD/KD: WT or KO MDSCs treated with DMSO as vehicle control;W16/K16: WT or KO MDSCs stimulated with recombinant CXCL16;WT6/KT6: WT or KO MDSCs stimulated with Hepa1-6 conditioned medium in the presence of a CXCR6 inhibitor;W166/K166: WT or KO MDSCs co-treated with recombinant CXCL16 and a CXCR6 inhibitor. Data are presented as mean ± s.e.m. Statistical analysis: multiple unpaired t-tests (A).

**Figure S6. p65 inhibition suppresses tumor-induced activation of MDSC subsets in vitro.**

(A) Flow cytometry analysis of monocytic MDSCs (M-MDSCs, CD11b⁺Ly6G⁻Ly6Chigh) and polymorphonuclear MDSCs (PMN-MDSCs, CD11b⁺Ly6G⁺Ly6Clow) derived from wild-type (WT) and DNASE1L3 knockout (KO) mice. Representative gating plots and histograms illustrate subset distribution under different conditions. Hepa1-6 conditioned medium stimulation enhanced PMN-MDSC accumulation, especially in KO-derived MDSCs, while treatment with a p65 inhibitor (TK6, IK6) attenuated this effect, implicating NF-κB signaling as a key downstream mediator of DNASE1L3-dependent MDSC activation.

Experimental groups included:WN/KN: Untreated MDSCs derived from WT or KO mice;TW/TK: WT or KO MDSCs treated with Hepa1-6 conditioned medium;WD6/KD6: WT or KO MDSCs treated with DMSO (vehicle for p65 inhibitor);TW6/TK6: WT or KO MDSCs treated with Hepa1-6 conditioned medium followed by p65 inhibitor;IW6/IK6: WT or KO MDSCs directly treated with p65 inhibitor alone. Data are presented as mean ± s.e.m. Statistical analysis: one-way ANOVA (A).

**Figure S7. HDAC9 inhibition attenuates CXCR6 upregulation in DNASE1L3-deficient MDSCs.**

(A) Flow cytometry analysis of CXCR6 surface expression in MDSCs derived from wild-type (WT) and DNASE1L3 knockout (KO) mice. Representative dot plots and histograms are shown. Hepa1-6 stimulation robustly induced CXCR6 upregulation in KO-derived MDSCs (TK), while pharmacologic inhibition of HDAC9 (IK9, TK9) markedly reduced CXCR6 expression, indicating that DNASE1L3 regulates CXCR6 transcription in an HDAC9-dependent manner. Experimental groups included: WN/KN: Untreated MDSCs from WT or KO mice;TW/TK: WT or KO MDSCs stimulated with Hepa1-6 conditioned medium;WD9/KD9: WT or KO MDSCs treated with DMSO (vehicle control for HDAC9 inhibitor);IW9/IK9: WT or KO MDSCs treated with HDAC9 inhibitor alone;TW9/TK9: WT or KO MDSCs stimulated with Hepa1-6 conditioned medium followed by HDAC9 inhibitor treatment. Data are presented as mean ± s.e.m. Statistical analysis: one-way ANOVA (A).


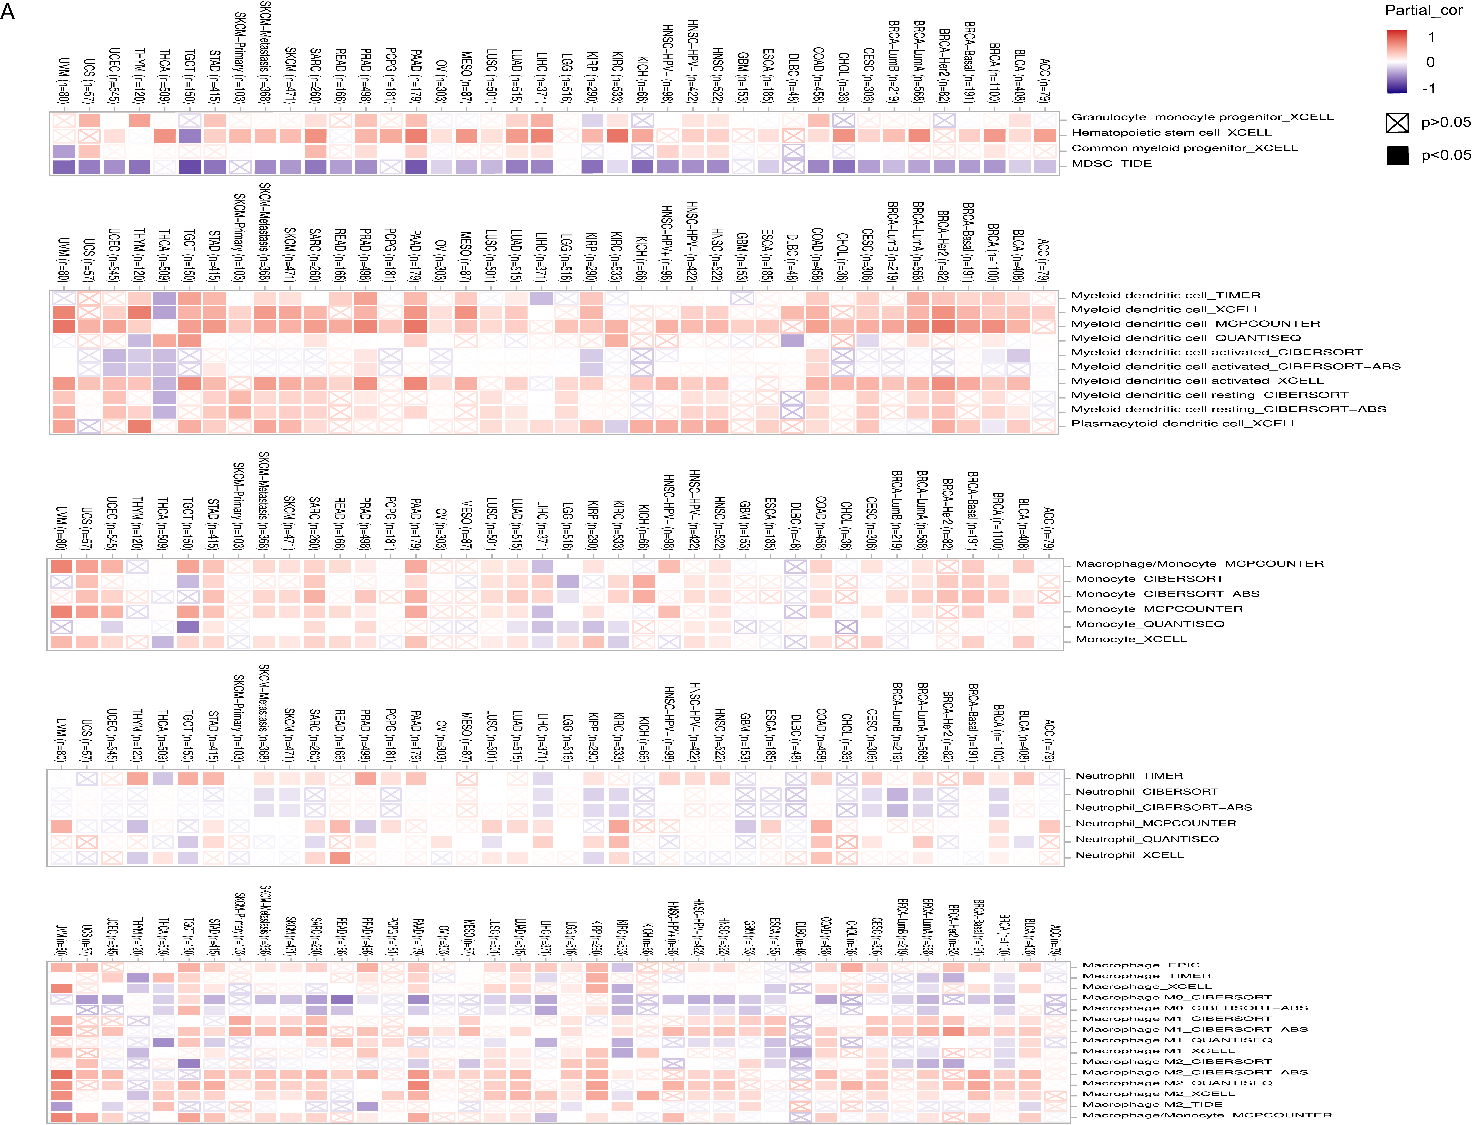


Figure S1


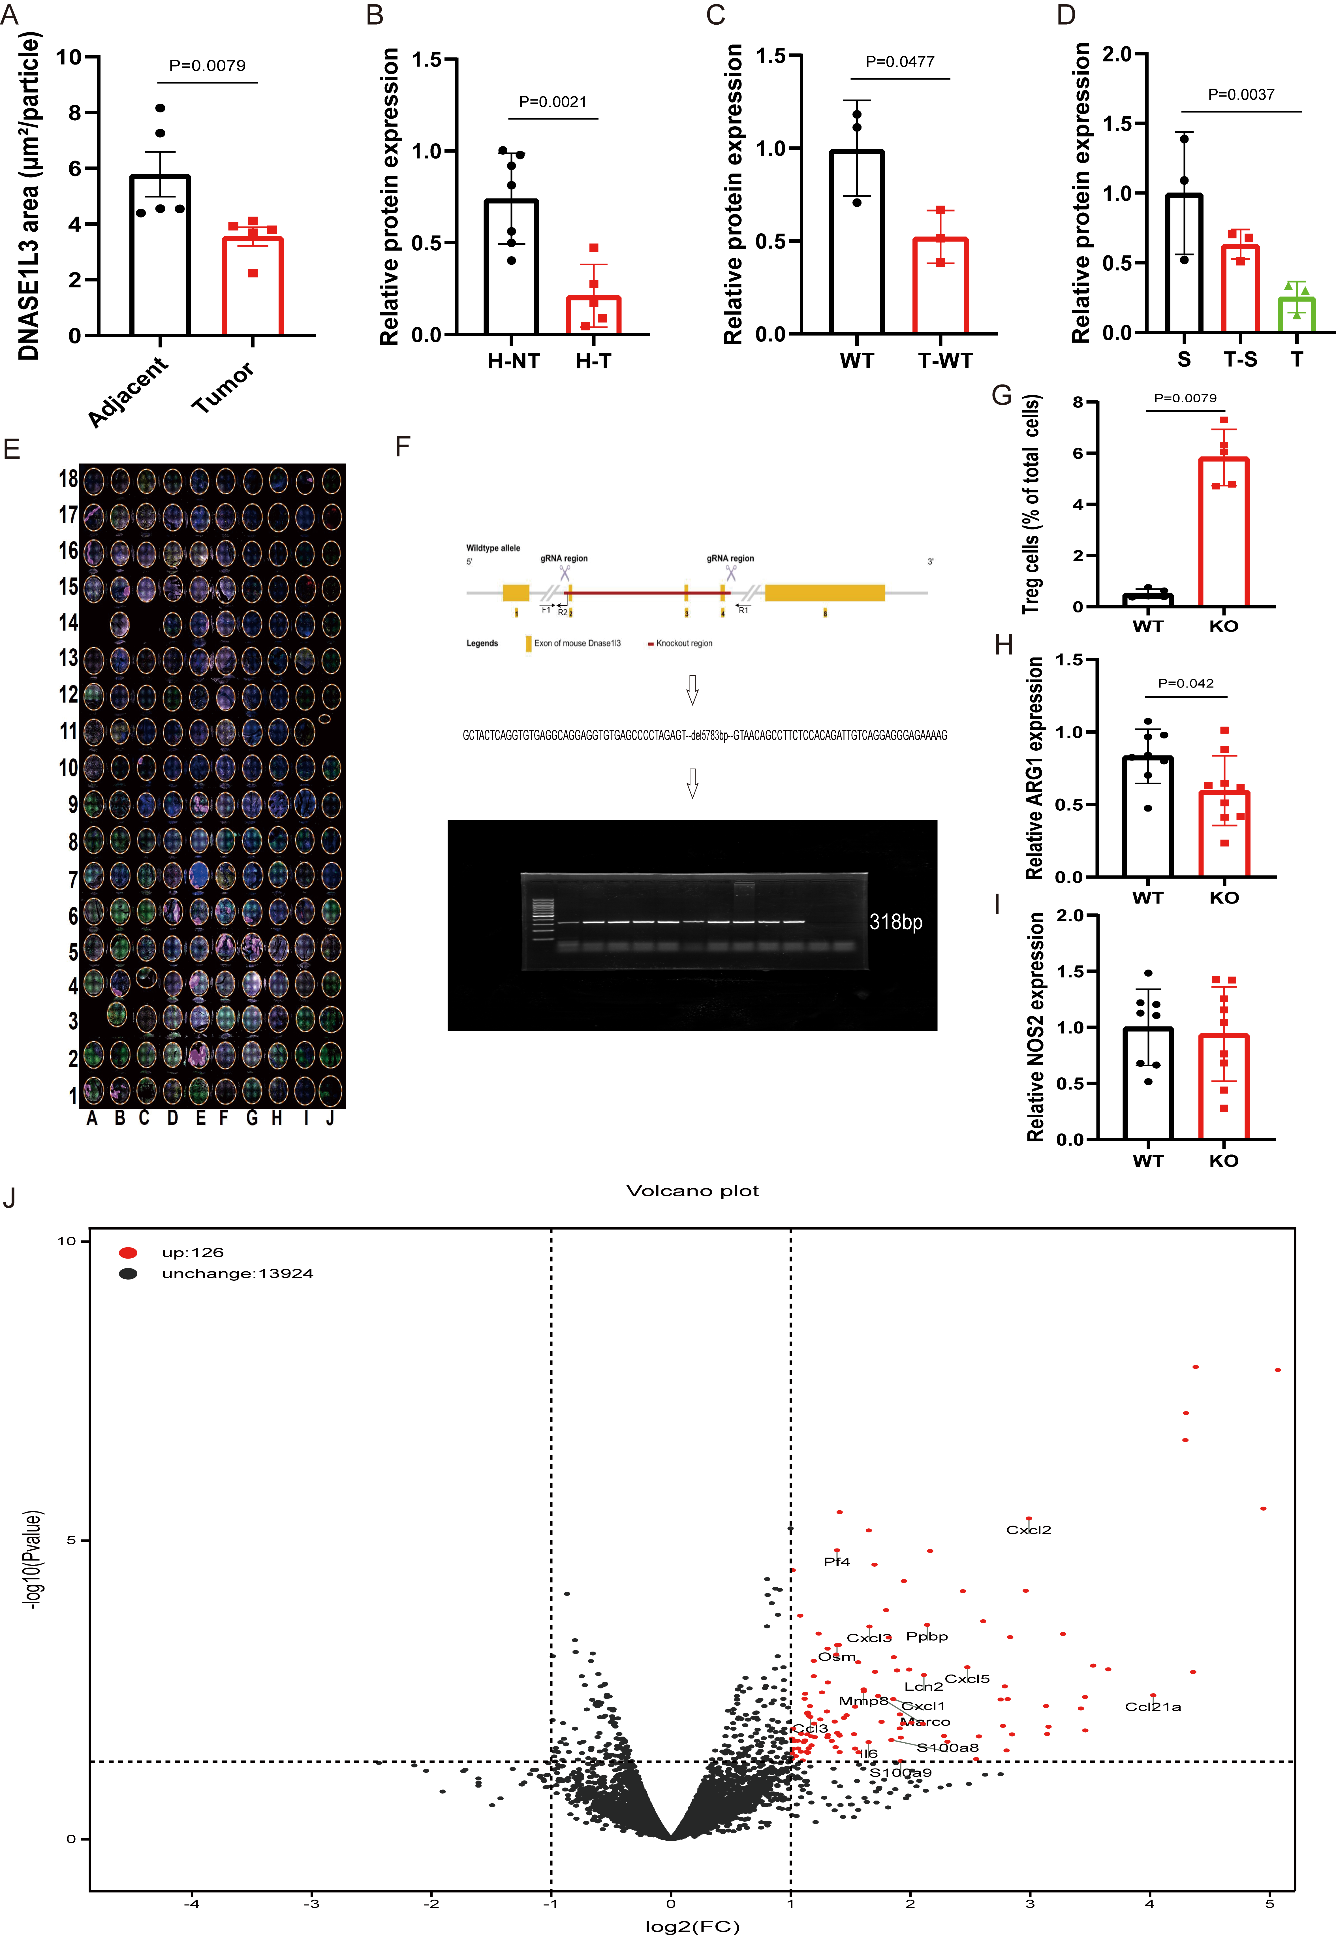


Figure S2


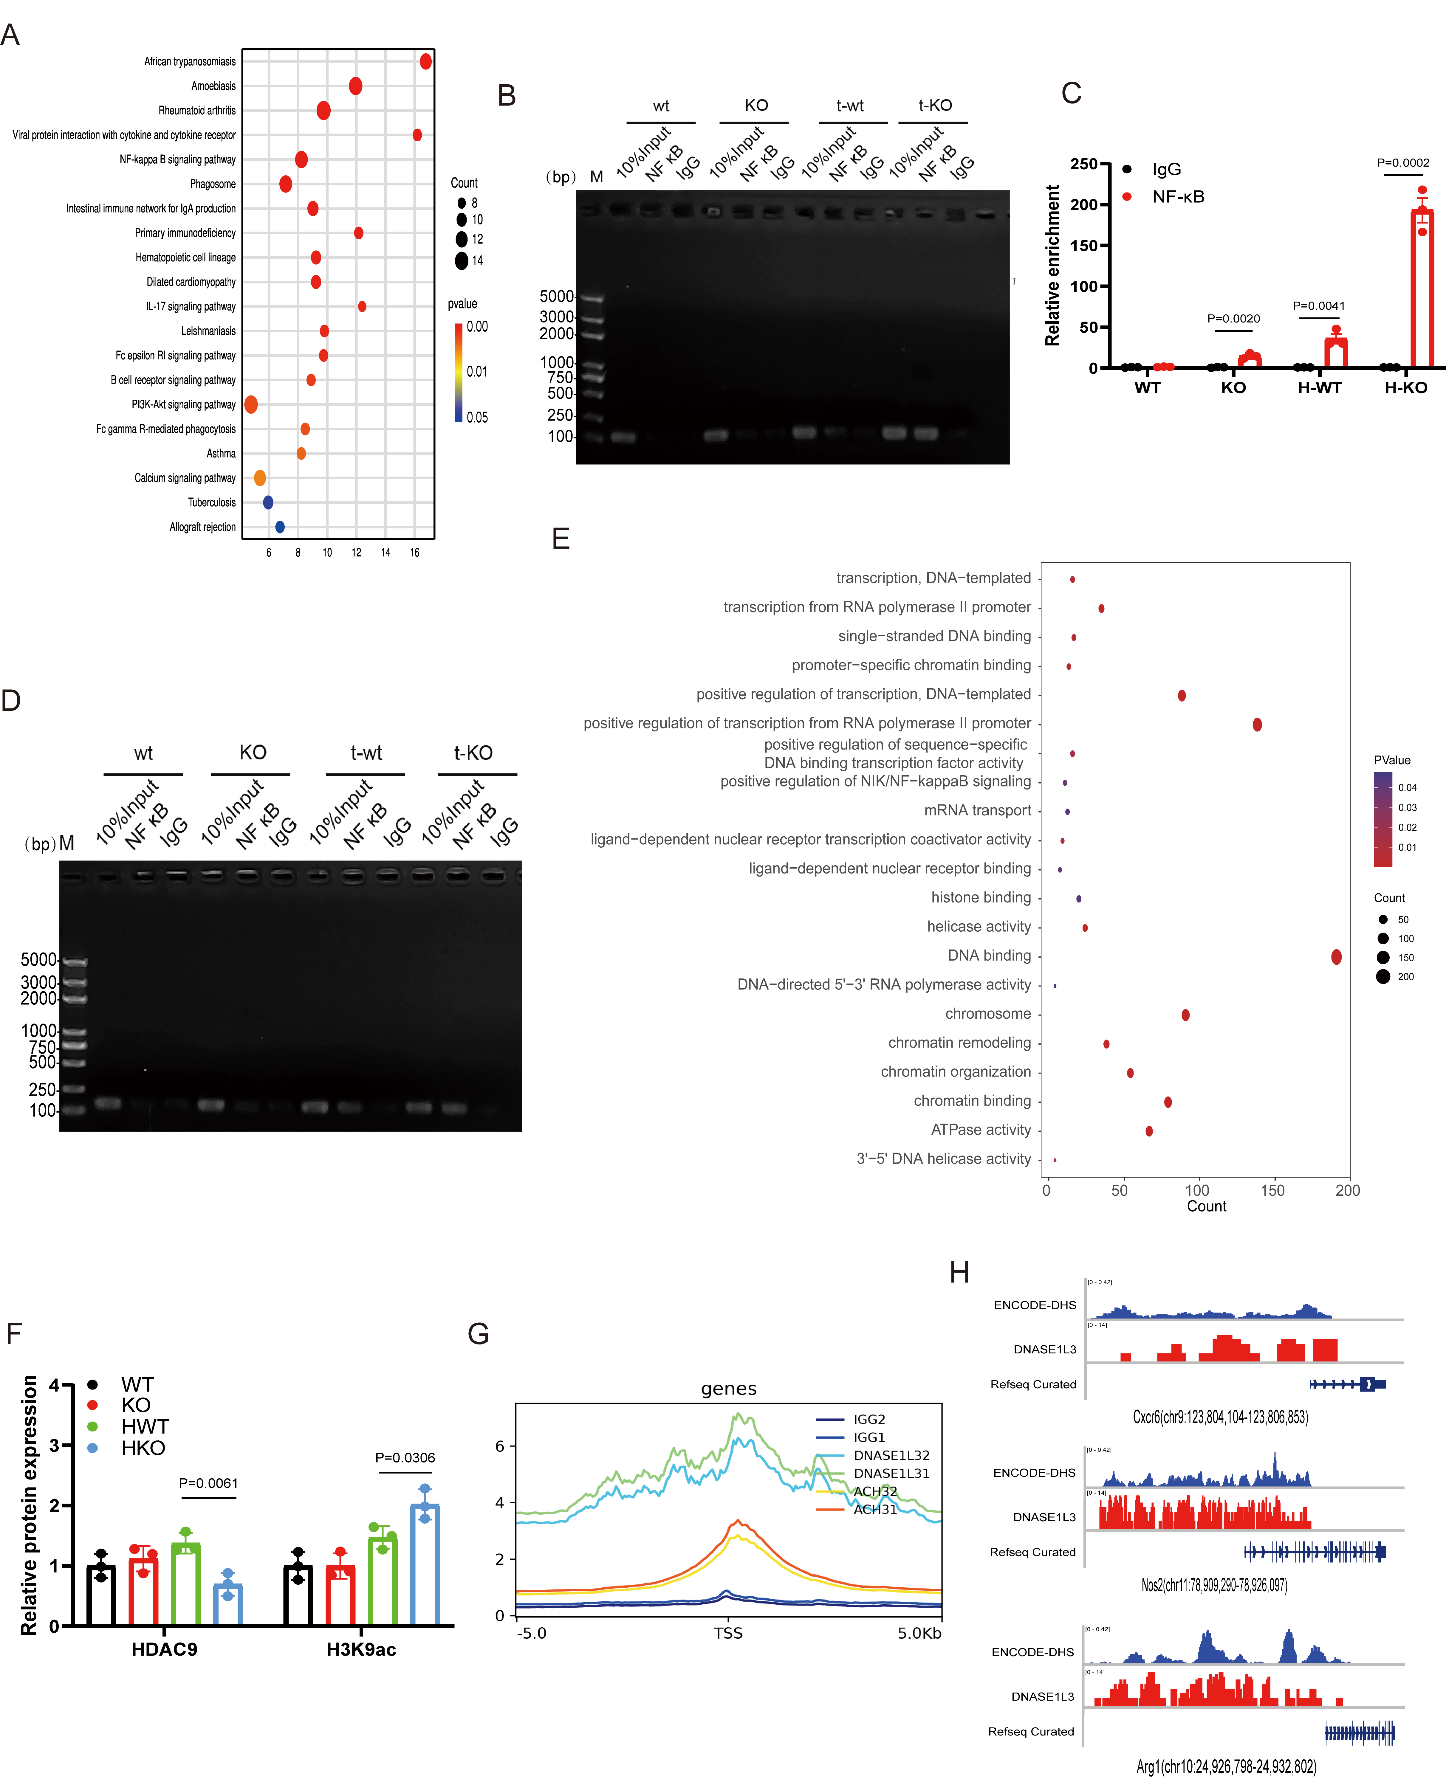


Figure S3


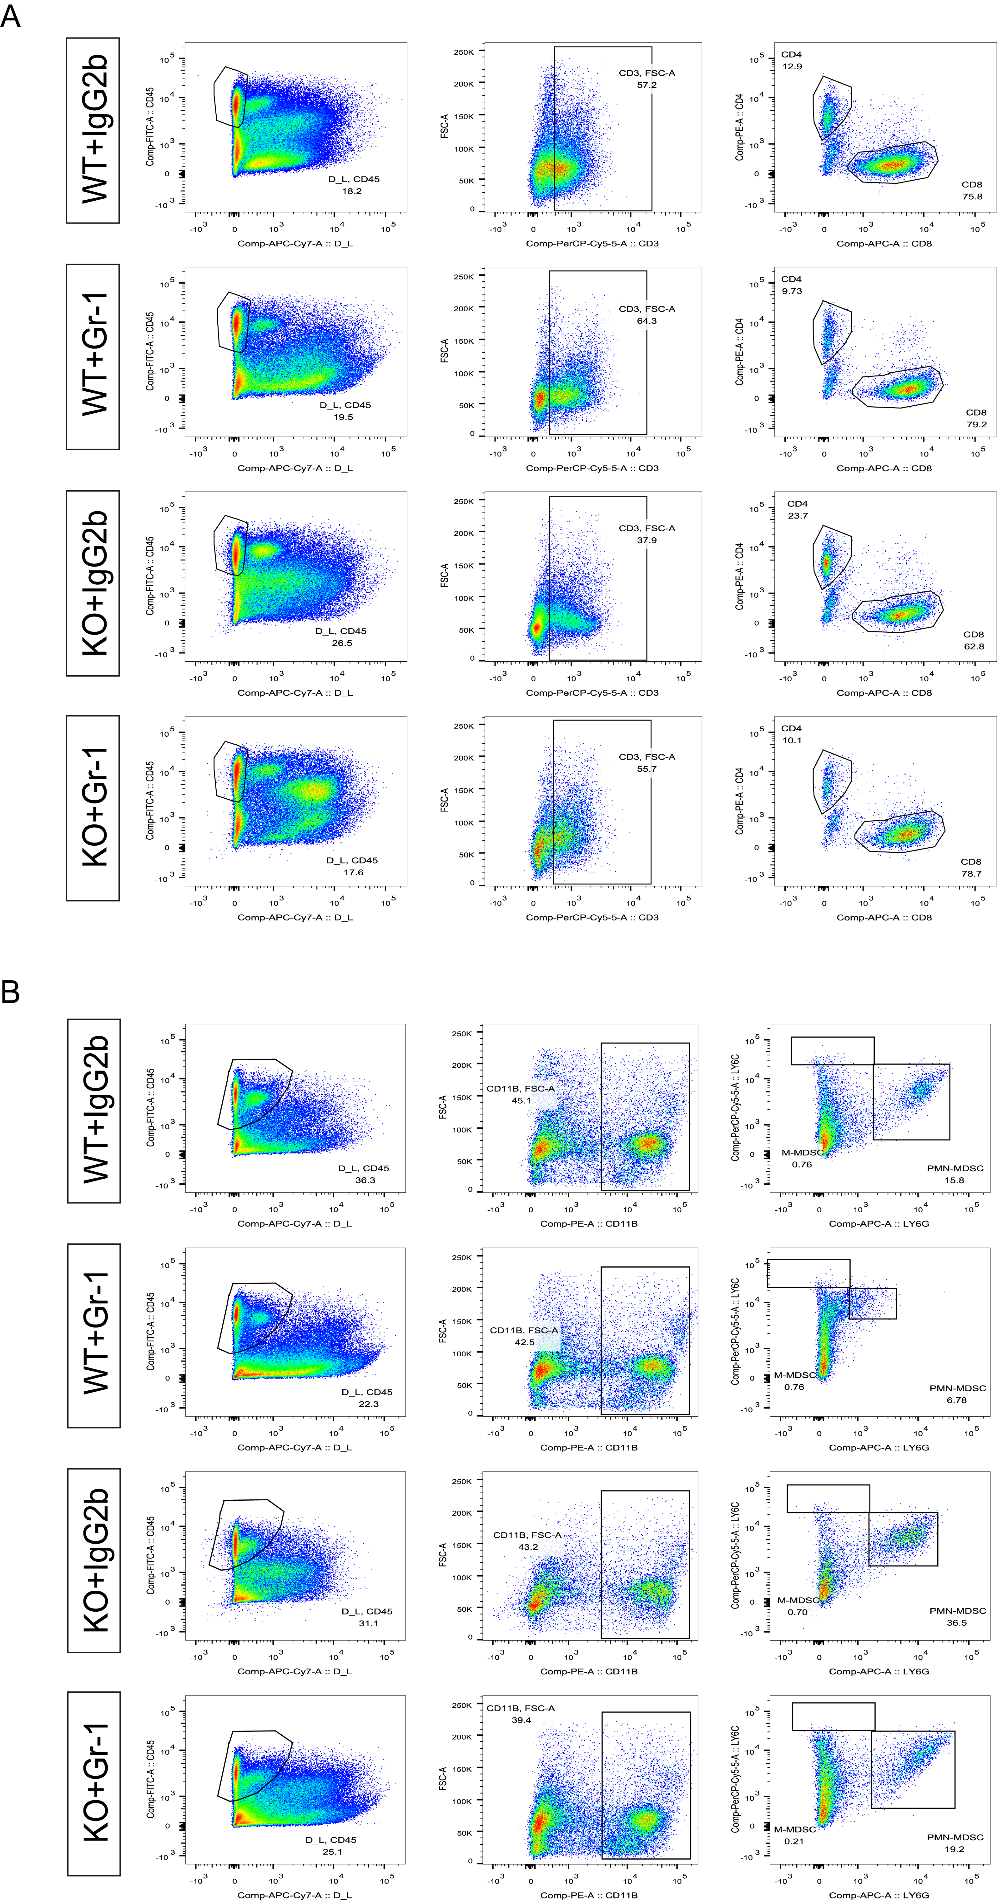


Figure S4


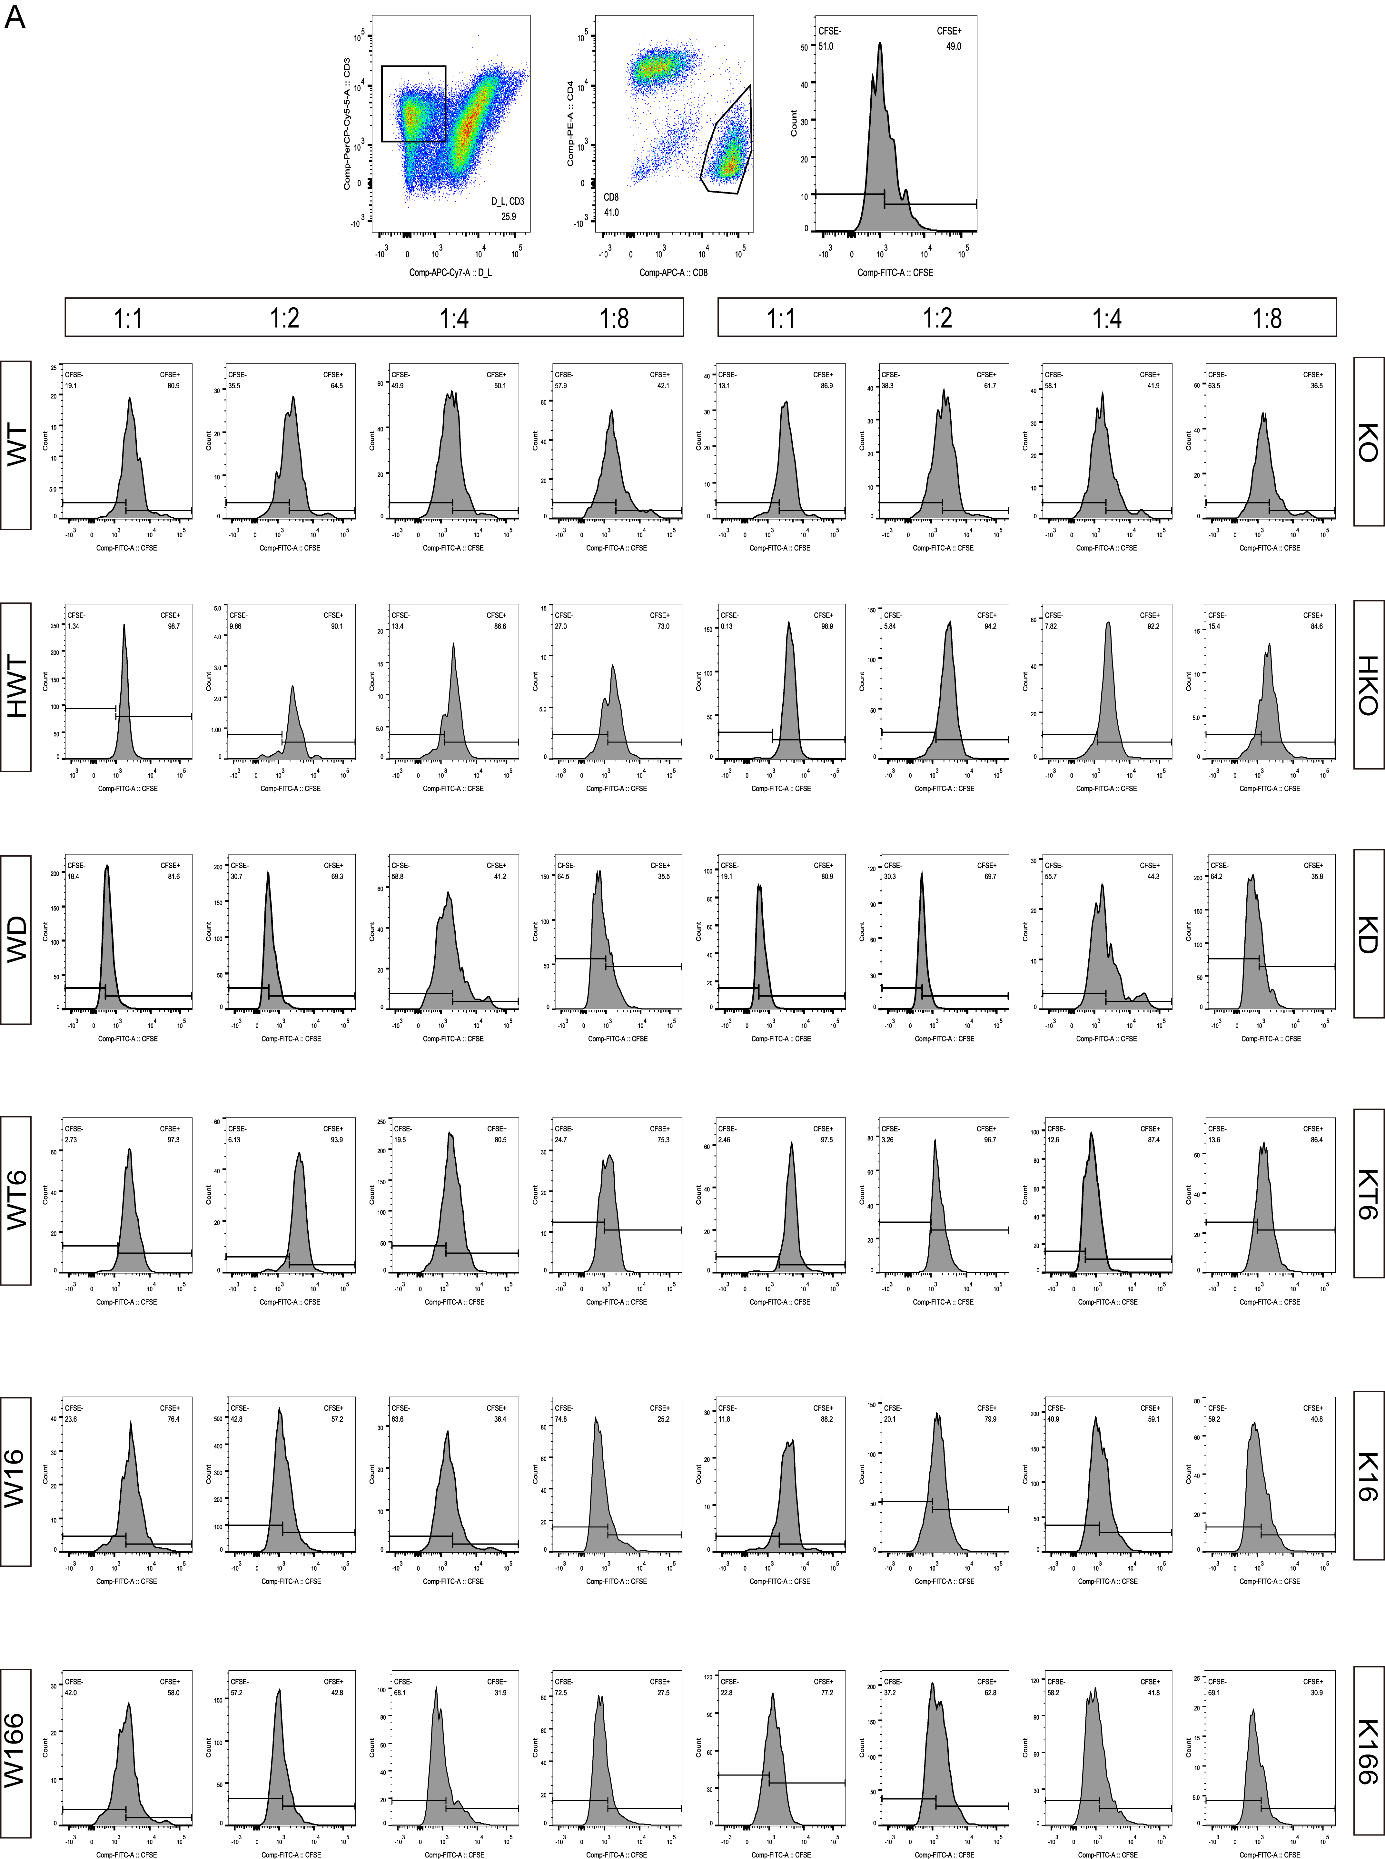


Figure S5


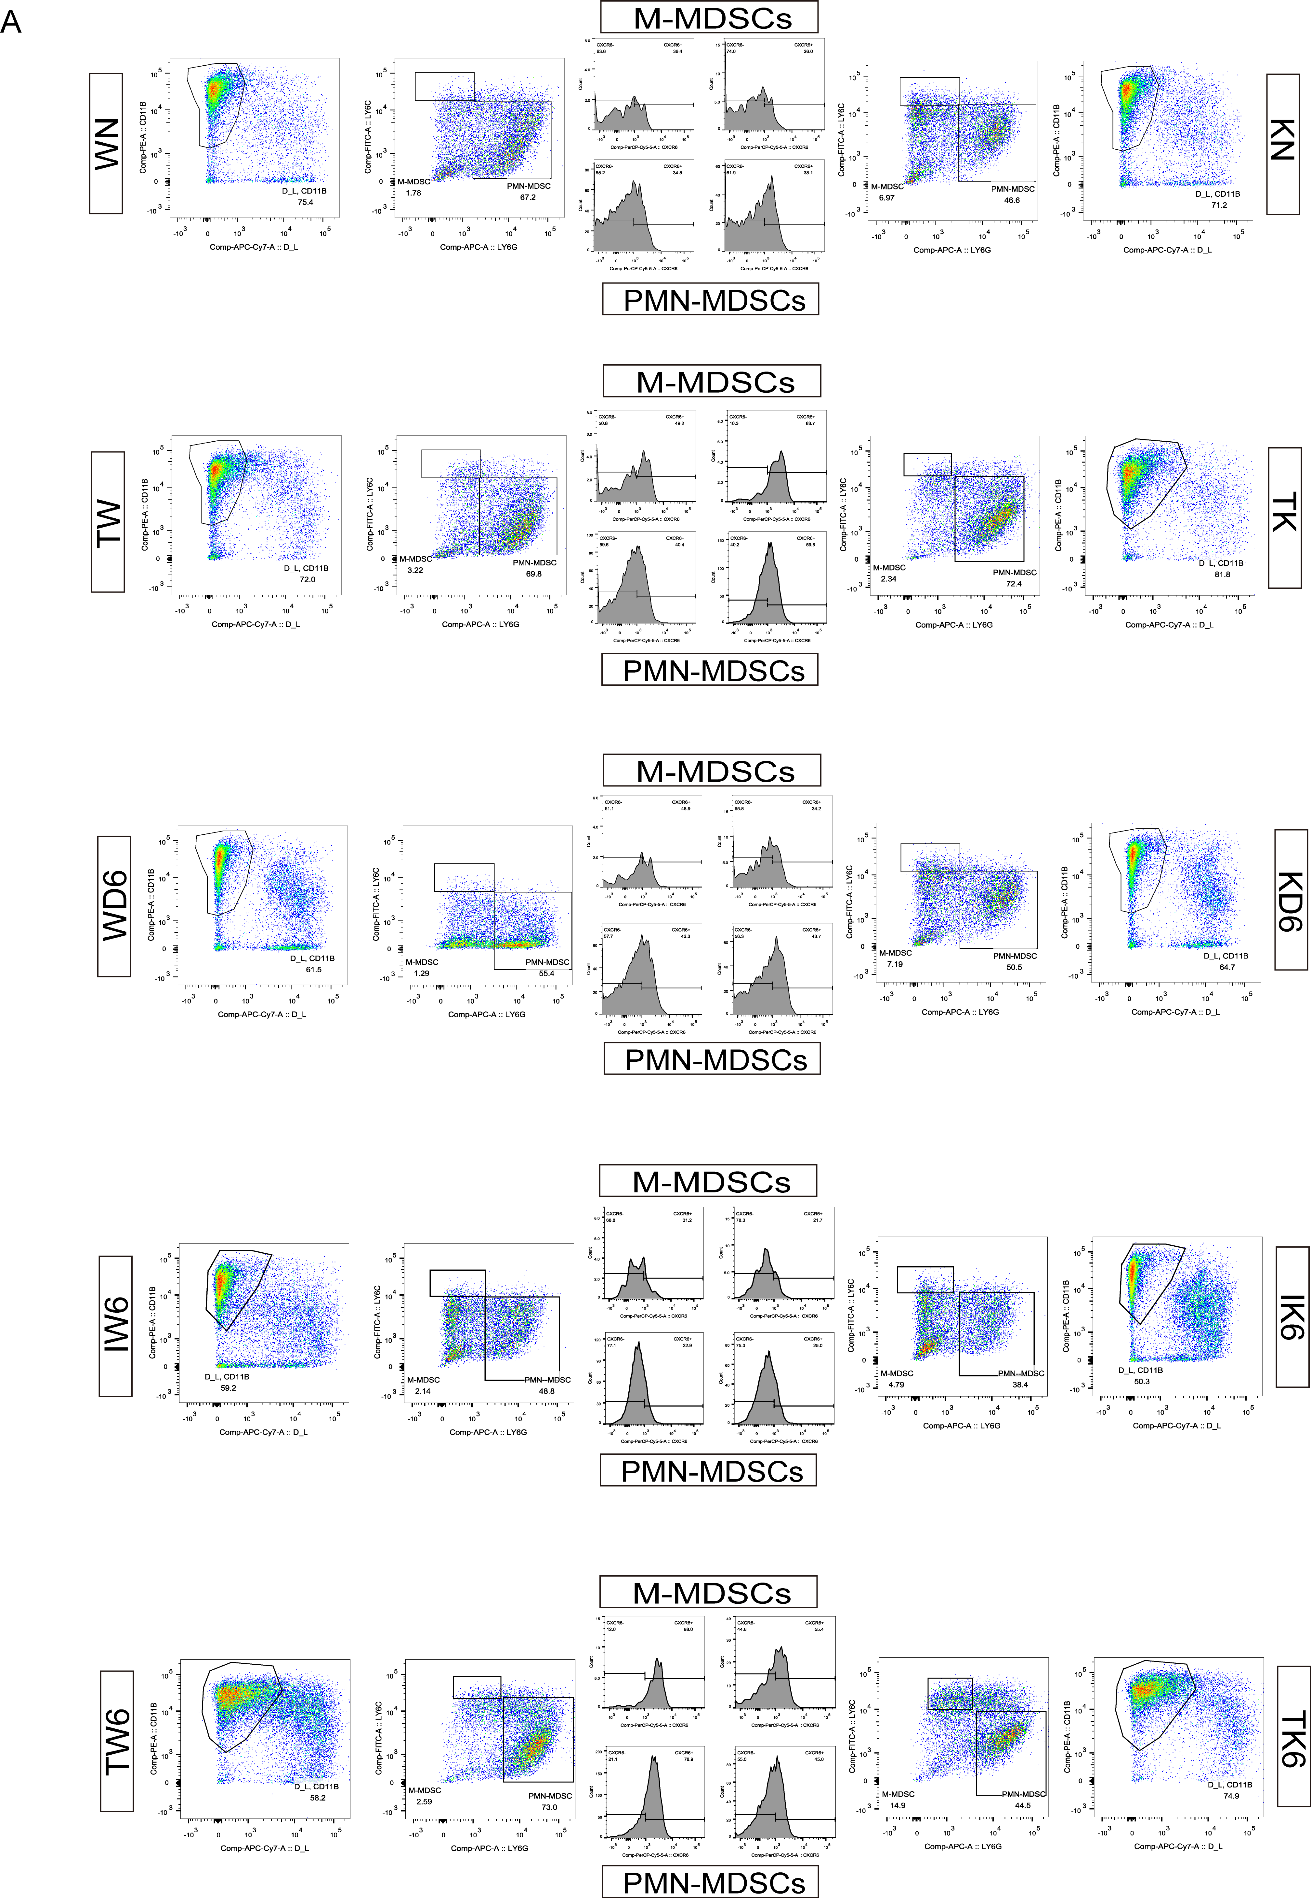


Figure S6


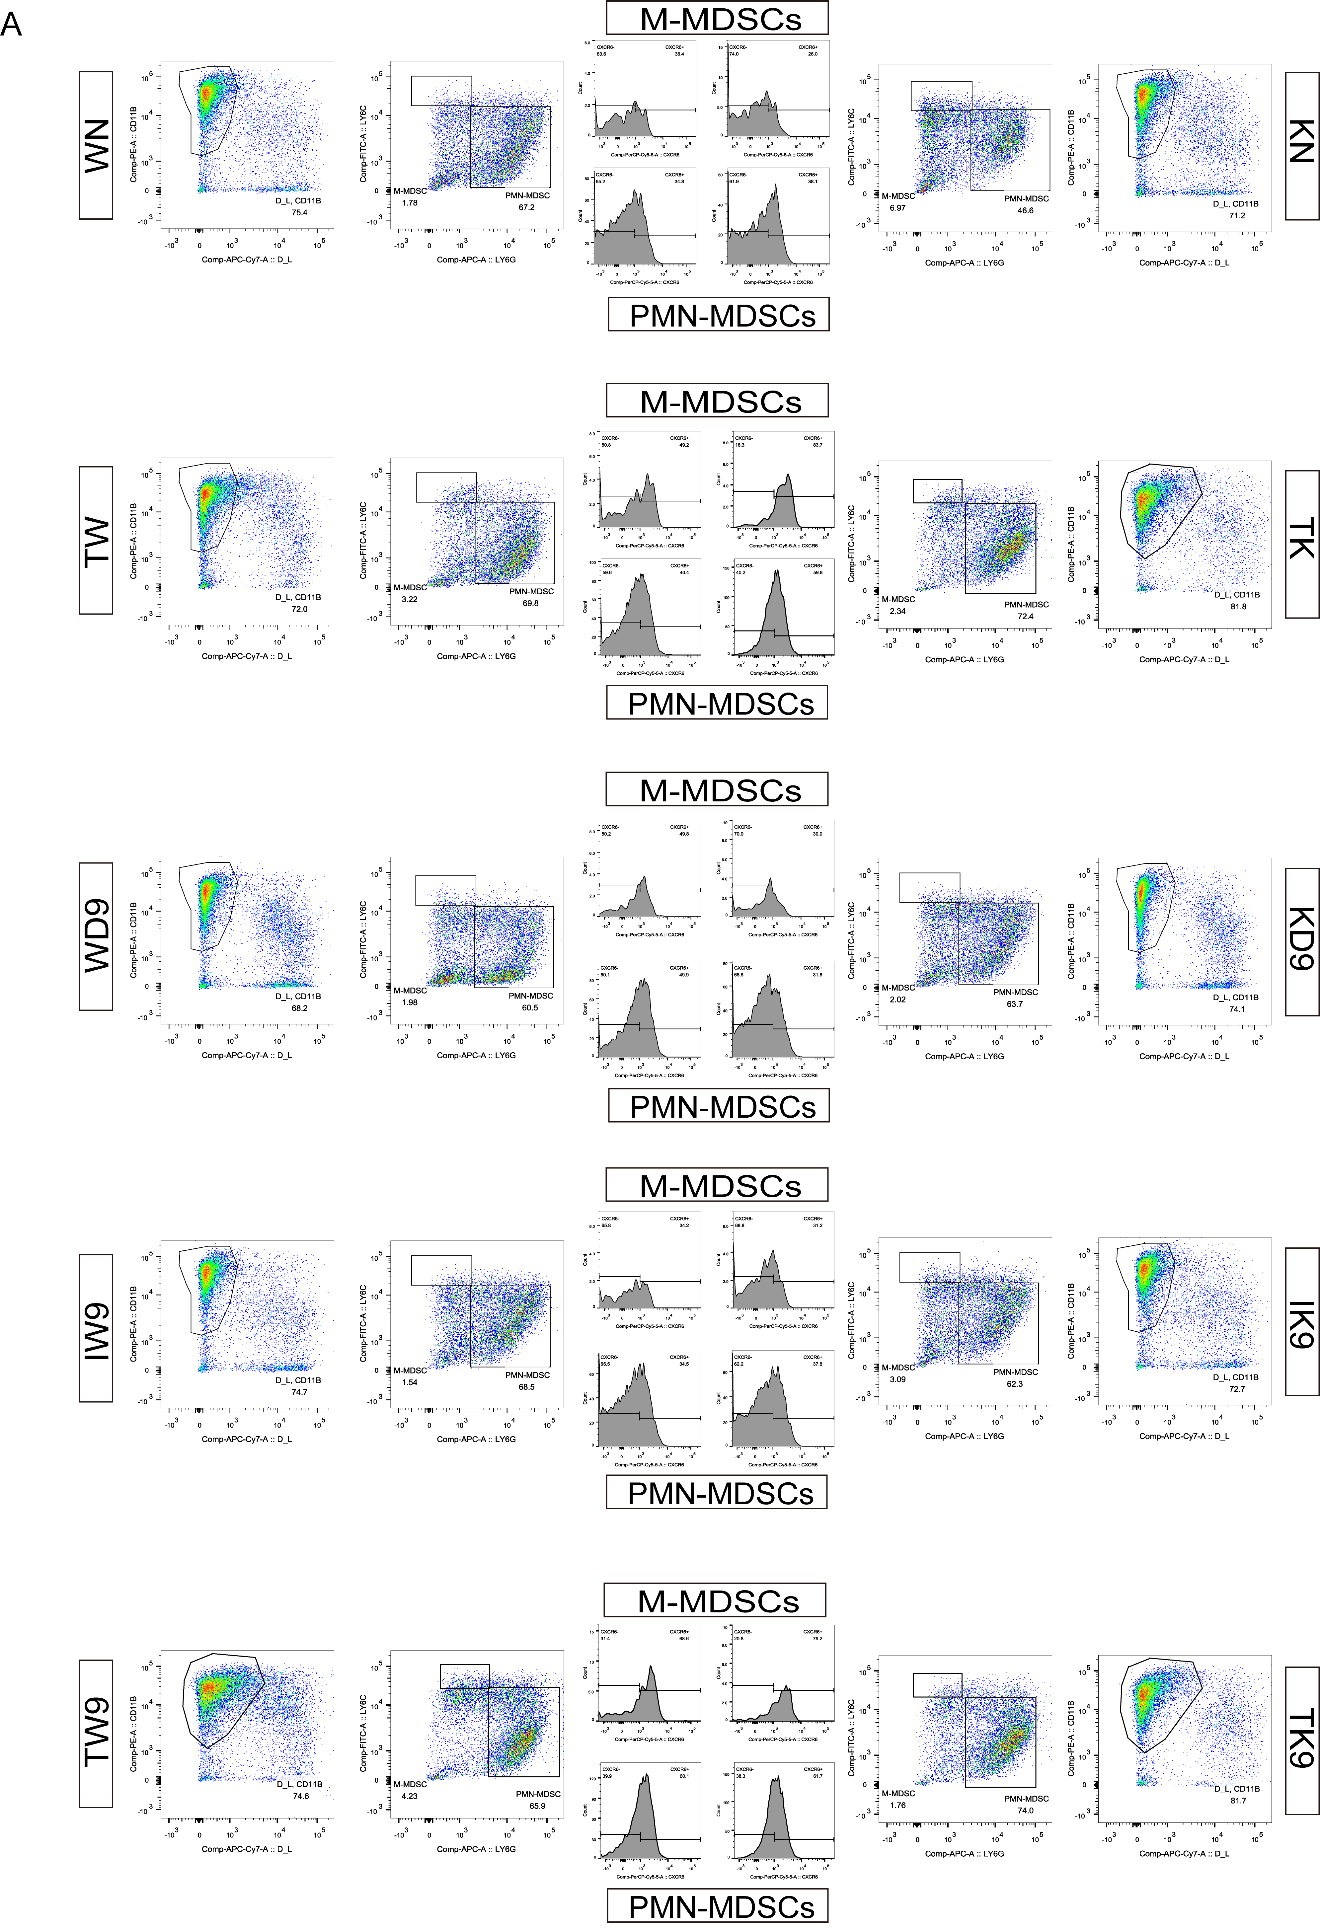


Figure S7
