# Supplementary material for: Loss of DNASE1L3 Drives MDSCs-Mediated Immune Suppression in HCC via HDAC9-Dependent Chromatin Remodeling and CXCL16–CXCR6 Signaling
Source: Research Square preprint supplement (doi:10.21203/rs.3.rs-7066350/v1), 2025-07-17
Supplement: Supplementary file 2 [file 64886b1d32353fdda6084b6f.docx]

Supplementary Table 1. Antibodies

| **Name** | **Cat no.** | **Supplier** |
| --- | --- | --- |
| NF-κB Pathway Antibody Sampler Kit | 9936 | CST |
| Rabbit polyclonal anti-Phospho-PI3 Kinase p85 (Tyr458)/p55 (Tyr199) | 4228 | CST |
| Rabbit monoclonal anti-Phospho-Akt (Ser473) | 4060 | CST |
| Rabbit monoclonal anti-Akt (pan) (C67E7) | 4691 | CST |
| Rabbit monoclonal anti-PI3 Kinase p85 (19H8) | 4257 | CST |
| Rabbit monoclonal anti-HDAC9 | A2226 | ABclonal |
| Rabbit monoclonal anti-Acetyl-Histone H3-K9 | A21107 | ABclonal |
| Rabbit polyclonal anti-CD25 | A2984 | ABclonal |
| Rabbit polyclonal anti-CD33 | A2059 | ABclonal |
| Rabbit polyclonal anti-NF-κB p65 | 10745-1-AP | Proteintech |
| Rabbit polyclonal anti-Arginase-1 | 16001-1-AP | Proteintech |
| Rabbit polyclonal anti-iNOS | 22226-1-AP | Proteintech |
| Mouse monoclonal anti-Beta actin | 66009-1-Ig | Proteintech |
| HRP-Goat Anti-Rabbit | RGAR001 | Proteintech |
| HRP-Goat Anti-Mouse | RGAM001 | Proteintech |
| Rabbit polyclonal anti-DNASE1L3 | GTX114363 | GeneTex |
| Rabbit polyclonal anti-CD11b | GB115693-100 | Servicebio |
| Rabbit polyclonal anti-FOXP3 | GB115746 | Servicebio |
| InVivoMAb anti-mouse Ly6G/Ly6C (Gr-1) | BE0075 | BioXcell |
| PerCP/Cyanine5.5 anti-mouse CD186 (CXCR6) | 151120 | BioLegend |
| FITC anti-mouse CD38 | 102705 | BioLegend |
| PE anti-mouse CD129 (IL-9R) | 158703 | BioLegend |
| PE anti-mouse/human CD11b | 101207 | BioLegend |
| APC anti-mouse Ly-6G | 127613 | BioLegend |
| FITC anti-mouse Ly-6C | 128005 | BioLegend |
| FITC anti-human CD3 | 981002 | BioLegend |
| PE anti-mouse CD4 | 100407 | BioLegend |
| PerCP/Cyanine5.5 anti-mouse CD8a | 100733 | BioLegend |

Supplementary Table 2.Sequence based reagents

| **Name** | **Sequence** |
| --- | --- |
| Dnase1l3 | Forward: 5’- CTCTGCTCCTTCAATGTGAGG -3’  Reverse: 5’- GCTGCTGTCCTTGATTTCCAT -3’ |
| β-Actin | Forward: 5’- GGCTGTATTCCCCTCCATCG -3’  Reverse: 5’- CCAGTTGGTAACAATGCCATGT -3’ |
| ARG1 | Forward: 5’- CTCCAAGCCAAAGTCCTTAGAG -3’  Reverse: 5’- AGGAGCTGTCATTAGGGACATC -3’ |
| NOS2 | Forward: 5’- GTTCTCAGCCCAACAATACAAGA -3’  Reverse: 5’- GTGGACGGGTCGATGTCAC -3’ |
| CXCR6 | Forward: 5’- GAGTCAGCTCTGTACGATGGG -3’  Reverse: 5’- TCCTTGAACTTTAGGAAGCGTTT -3’ |
| HDAC9 | Forward: 5’- GCGGTCCAGGTTAAAACAGAA -3’  Reverse: 5’- GCCACCTCAAACACTCGCTT -3’ |
| HDAC1 | Forward: 5’- AGTCTGTTACTACTACGACGGG -3’  Reverse: 5’- TGAGCAGCAAATTGTGAGTCAT -3’ |
| HDAC2 | Forward: 5’- GGAGGAGGCTACACAATCCG -3’  Reverse: 5’- TCTGGAGTGTTCTGGTTTGTCA -3’ |
| HDAC3 | Forward: 5’- GCCAAGACCGTGGCGTATT -3’  Reverse: 5’- GTCCAGCTCCATAGTGGAAGT -3’ |
| HDAC4 | Forward: 5’- CTGCAAGTGGCCCCTACAG -3’  Reverse: 5’- CTGCTCATGTTGACGCTGGA -3’ |
| HDAC5 | Forward: 5’- AGCACCGAGGTAAAGCTGAG -3’  Reverse: 5’- GCTGTGGGAGGGAATGGTT -3’ |
| HDAC6 | Forward: 5’- TCCACCGGCCAAGATTCTTC -3’  Reverse: 5’- CAGCACACTTCTTTCCACCAC -3’ |
| HDAC7 | Forward: 5’- GGCAGGCTTACACCAGCAA -3’  Reverse: 5’- TGGGCAGGCTGTAGGGAATA -3’ |
| HDAC8 | Forward: 5’- ACTATTGCCGGAGATCCAATGT -3’  Reverse: 5’- CCTCCTAAAATCAGAGTTGCCAG -3’ |
| HDAC10 | Forward: 5’- ACAGCCACTCGACTGCTCT -3’  Reverse: 5’- GATGCCTCACAAGCTGACAAA -3’ |
| ChIP on CXCR 6 promoter-Primer | Forward primer : 5’- AGGCAGTTCTAGCAAAGCCA -3’  Reverse primer : 5’- TAGGTGGTTGGTTGTGCTGG -3’ |
| Electrophoretic Mobility Shift Assay DNA Sequence | 5’-CAGAGTGTAGGGCTATACCAGGTCCTCCAGCACAACCAACC  ACCTAGA-3’ |
| Dnase1l3 gRNA | Forward strand of gene: GGTGTGAGCCCCTAGAGTTTGGG  Reverse strand of gene: TGGAGAAGGCTGTTACACTATGG |
| Genotype Identification  WT(800bp) | Forward 5’- CAGTGAAGGAATAGGAGACT -3’  Reverse 5’- TGCTTAGAGTGCTCATCC -3’ |
| Genotype Identification  KO(318bp) | Forward 5’- CAGGACTGGATAATGTACTTAG -3’  Reverse 5’- TGTGGAGAAGGCTGTTAC -3’ |
| pcDNA3.1 | pGL3-basic+ Firefly luciferase |
| TK | pGL3-basic+ Renilla luciferase |
| WT | 5‘-TCCTACTCCAAGTTCCTGACTTCCAGGCTAATTTTCCTGGAA  GTCAGCAATGCTAGCTCACGGAAAGTAAAAACCAGACTGCATTAAGATCATAGTGTCTATCAAATAGAGGAAAGTCCAGGAGGCTAACCTCAGGCAGTTCTAGCAAAGCCAAGCACGGTAGGTGGGCACTGCCTGCCAGAGGCCTGTGGGGGCAGAGTGTAGGGCTATACCAGGTCCTCCAGCACAACCAACCACCTA-3‘ |
| MT | 5‘-TCCTACTCCAAGTTCCTGACTTCCAGGCTAATTTTCCTGGAA  GTCAGCAATGCTAGCTCACGGAAAGTAAAAACCAGACTGCATTAAGATCATAGTGTCTATCAAATAGAttgcgtcatcGGAGGCTAACCTCAGGCAGTTCTAGCAAAGCCAAGCACGGTAGGTGGGCACTGCCTGCCAGAGGCCTGTGGGGGCAGAGTGTAGGGCTATACCAGGTCCTCCAGCACAACCAACCACCTA-3‘ |
| NF-κB | 5‘-ATGGACGATCTGTTTCCCCTCATCTTTCCCTCAGAGCCAGC  CCAGGCTTCTGGGCCTTATGTGGAGATCATCGAACAGCCGAAGCAACGGGGCATGCGATTCCGCTATAAATGCGAGGGGCGCTCAGCGGGCAGTATTCCTGGCGAGAGAAGCACAGATACCACCAAGACACACCCCACCATCAAGATCAATGGCTACACAGGACCAGGAACAGTTCGAATCTCCCTGGTCACCAAGGATCCACCTCACCGGCCTCATCCACATGAACTTGTGGGGAAGGACTGCCGGGATGGCTACTATGAGGCTGACCTCTGCCCAGACCGCAGTATCCATAGCTTCCAGAACCTGGGGATCCAGTGTGTGAAGAAGCGAGACCTGGAGCAAGCCATTAGCCAGCGAATCCAGACCAACAATAACCCCTTTCACGTTCCTATAGAGGAGCAGCGCGGGGACTATGACTTGAATGCAGTGCGCCTCTGCTTCCAGGTGACAGTGCGGGACCCAGCAGGCAGGCCCCTCCTCCTGACCCCTGTCCTCTCACATCCGATTTTTGATAACCGGGCCCCCAACACTGCCGAGCTCAAGATCTGCCGAGTAAACCGGAACTCTGGGAGCTGCCTCGGTGGGGATGAGATCTTCTTGCTGTGCGACAAGGTGCAGAAAGAAGACATTGAGGTGTATTTCACGGGACCAGGCTGGGAGGCACGAGGCTCCTTTTCTCAAGCTGATGTGCATCGGCAAGTGGCCATTGTGTTCCGGACTCCTCCGTACGCCGACCCCAGCCTCCAGGCTCCTGTTCGAGTCTCCATGCAGCTACGGCGGCCTTCTGATCGCGAGCTCAGTGAGCCCATGGAGTTCCAGTACTTGCCAGACACAGATGATCGCCACCGGATTGAAGAGAAGCGCAAAAGGACCTATGAGACCTTCAAGAGTATCATGAAGAAGAGTCCTTTCAATGGACCAACTGAACCCCGGCCTCCAACCCGGCGTATTGCTGTGCCTACCCGAAACTCAACTTCTGTCCCCAAGCCAGCCCCGCAGCCCTACACCTTCCCAGCATCCCTCAGCACCATCAACTTTGATGAGTTTTCCCCCATGCTGTTACCATCAGGGCAGATCTCAAACCAGGCCCTGGCCTTGGCACCGTCCTCTGCCCCAGTCCTTGCCCAGACCATGGTCCCTTCCTCAGCCATGGTACCTCTGGCTCAGCCCCCAGCTCCTGCCCCAGTTCTAACCCCGGGTCCTCCCCAGTCCCTGTCTGCACCTGTTCCAAAGAGCACCCAGGCTGGGGAAGGCACGCTGTCGGAAGCCCTGCTGCACCTGCAGTTTGATGCTGATGAAGACTTGGGGGCCTTGCTTGGCAACAGCACAGACCCAGGAGTGTTCACAGACCTGGCATCTGTGGACAACTCAGAGTTTCAGCAGCTCCTGAACCAGGGTGTGTCCATGTCTCACTCCACAGCTGAGCCCATGCTGATGGAGTACCCTGAAGCTATAACTCGCCTGGTGACAGGGTCCCAGAGGCCCCCTGACCCAGCTCCCACACCCCTGGGGACCTCGGGGCTTCCCAATGGTCTCTCAGGAGATGAAGACTTCTCCTCCATTGCGGACATGGACTTCTCTGCTCTTTTGAGTCAGATCAGCTCCTAA-3‘ |

Supplementary Table 3. Software

| **Software name** | **Manufacturer/ Version** |
| --- | --- |
| FlowJo | BD Biosciences 10.8.0 |
| GraphPad Prism | GraphPad Software 8.4.3 |
| vazymecloud | http://cloud.vazyme.com |
| BMKCloud | http://www.biocloud.net |
| TIMER2.0 | http://timer.cistrome.org |
| JASPAR | https://jaspar.elixir.no/ |
| AlphaFold3 | v3.0.0 |
| SWISS-MODEL | https://swissmodel.expasy.org |
| AlphaFold Server | https://alphafold.ebi.ac.uk |
| ENCODE | www.encodeproject.org |
| ChimeraX | https://www.cgl.ucsf.edu/chimerax |

Supplementary Table 4. Other (e.g. drugs, proteins, vectors etc.)

| **Name** | **Cat no.** | **Supplier** |
| --- | --- | --- |
| **Growth factors** |  |  |
| CD3e monoclonal Antibody (145-2C11) | 16-0031-38 | eBioscience |
| CD28 monoclonal Antibody (37.51) | 16-0281-82 | eBioscience |
| Recombinant Mouse CXCL16 (C-6His) | CC44 | Novoprotein |
| Recombinant Mouse GM-CSF (C-6His) | CJ46 | Novoprotein |
| Recombinant Human GM-CSF (E. coli) | C003 | Novoprotein |
| Recombinant Human IL-6 | C009 | Novoprotein |
| Recombinant Mouse IL-6 | CG39 | Novoprotein |
| Recombinant Mouse IL-2 | CK24 | Novoprotein |
| **Supplements and chemicals** |  |  |
| ML339 | SJ-MX5802 | Sparkjade |
| JSH-23 | HY-13982 | MCE |
| TMP269 | HY-18360 | MCE |
| H2O2 | 88597 | Millipore |
| NAC | S1623 | Selleck |
| DNASE1 | D8071 | Solarbio |
| Collagenase I | C8140 | Solarbio |
| TRIZOL™ Reagent | 15596018CN | Invitrogen |
| Proteinase K | ST535 | Beyotime |
| **Assay kits** |  |  |
| Hyperactive Universal CUT&Tag Assay Kit for Illumina Pro | TD904 | Vazyme |
| Nuclear and Cytoplasmic Protein Extraction Kit | P0028 | Beyotime |
| Mouse CXCL16 ELISA Kit | CSB-E08873m | CUSABIO |
| Myeloid-Derived Suppressor Cell Isolation Kit mouse | 130-094-538 | Miltenyi Biotec |
| ABScript III RT Master Mix for qPCR with gDNA Remover | RK20429 | ABclonal |
| PerfectStart® Green qPCR SuperMix | AQ601 | TransGen Biotech |
| NO Detection Kit | S0023 | Beyotime |
| Gloria Nova HS 2X Master Mix with Dye | RK20728 | ABclonal |
| **Cell culture reagents** |  |  |
| DMEM/F12 | 11330032 | Life Technologies |
| Transwell permeable supports | 3470/3460 | Corning Costar |
| RPMI/1640 | 22400071 | Life Technologies |
| Basement Membrane Matrix | 356230 | Corning |
